# Supplementary material for: Plasma Protein Biomarkers for Depression and Schizophrenia by Multi Analyte Profiling of Case-Control Collections
Source: PubMed Central journal article supplement (PMC2820097; doi:10.1371/journal.pone.0009166), 2010-02-11

## Spearman's correlation to PANNS

Thrombopoietin  
Apolipoprotein\_A1  
IL\_1alpha  
Complement\_3  
Leptin  
IL\_3  
Alpha\_2\_Macroglobulin  
Myoglobin  
MCP\_1  
MIP\_1alpha  
Cancer\_Antigen\_19\_9  
ENA\_78  
Fatty\_Acid\_Binding\_Protein  
PAI\_1  
Eotaxin  
Brain\_Derived\_Neurotrophic\_Facto  
Stem\_Cell\_Factor  
Insulin  
Growth\_Hormone  
Apolipoprotein\_CIII

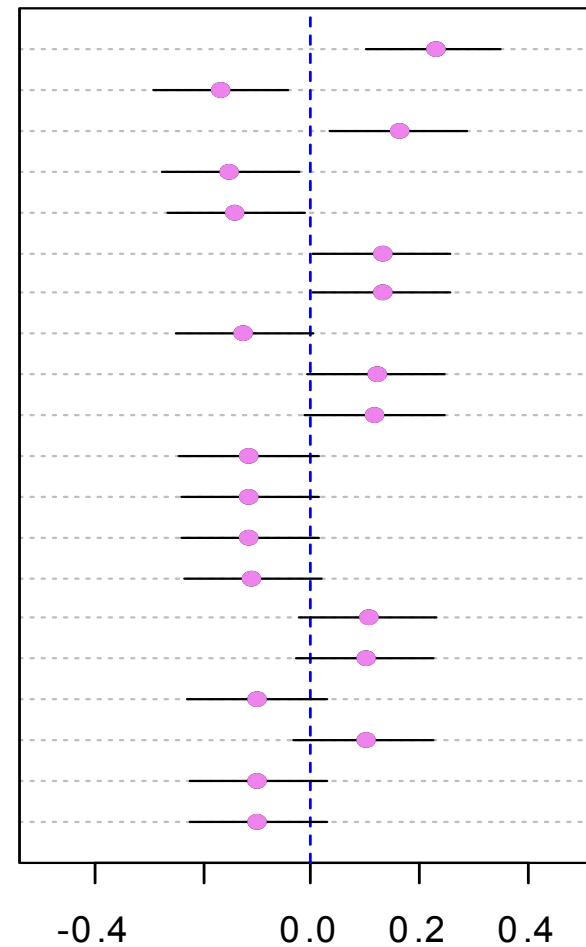

Supplement: pone.0009166.s008.pdf [file pone.0009166.s008.pdf]
