# Supplementary material for: Plasma Protein Biomarkers for Depression and Schizophrenia by Multi Analyte Profiling of Case-Control Collections
Source: PLOS journal article supplement (doi:10.1371/journal.pone.0009166), 2010-02-10

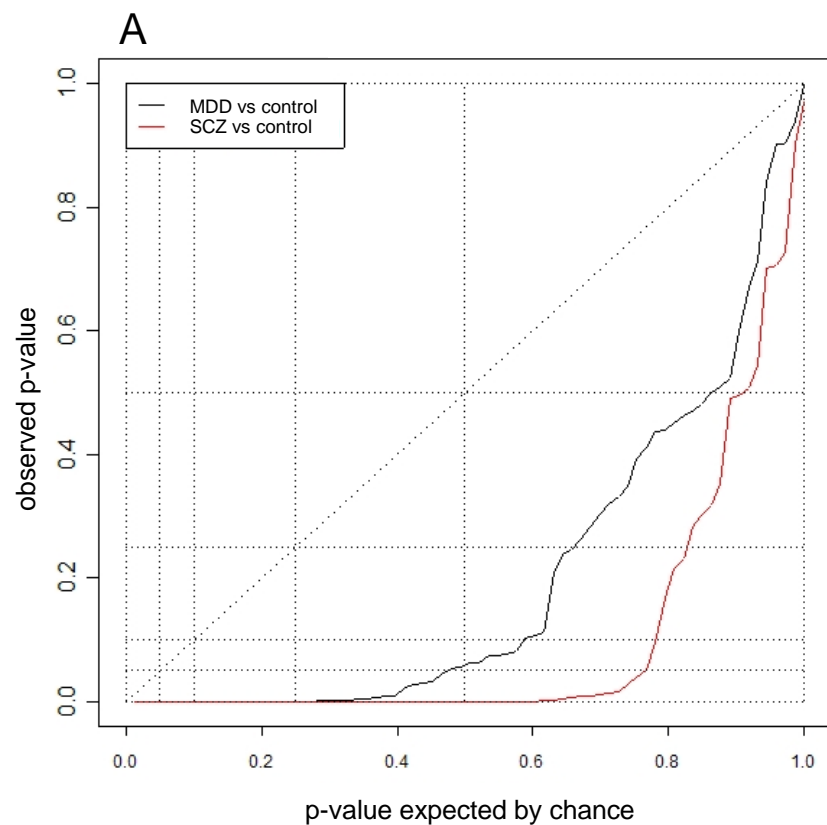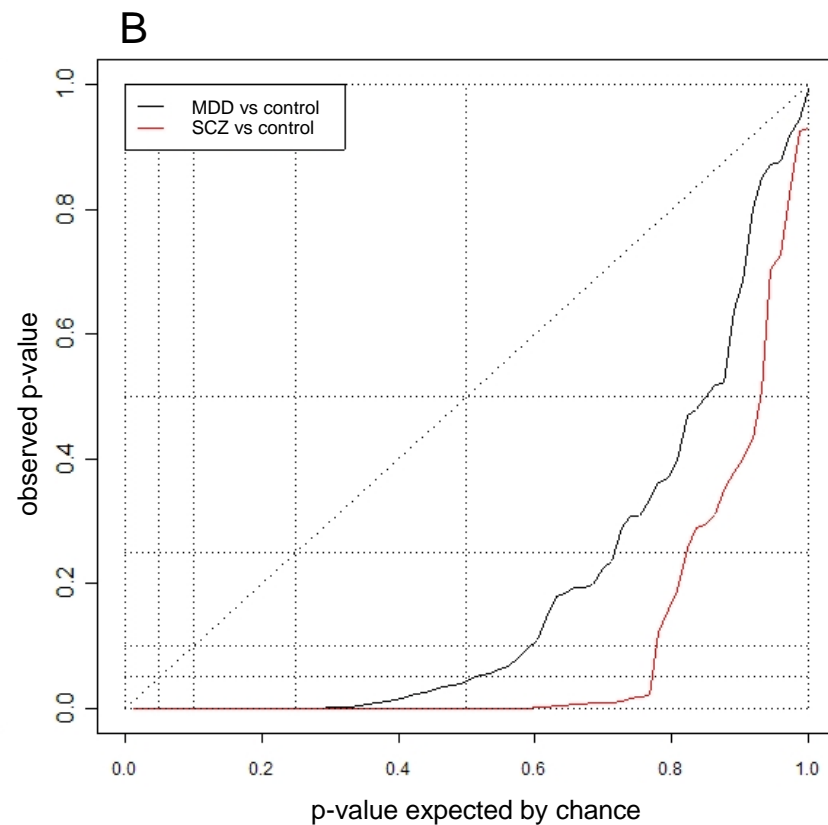

Supplement: S4 (10.1371/journal.pone.0009166.s004) [file journal.pone.0009166.s004]
